# Supplementary material for: Claudin Association with CD81 Defines Hepatitis C Virus Entry
Source: PubMed Central journal article supplement — J Biol Chem. 2010 Apr 7;285(27):21092–102. doi: 10.1074/jbc.M110.104836 (PMC2898367; doi:10.1074/jbc.m110.104836), 2010-04-07

### Supplementary figure legends.

**Fig.S1. Effect of FRET on CLDN1-CD81 FIR.** To determine if FRET between AcGFP (g) and DsRED (r) tagged g.CLDN1 and r.CD81 affects FIR, pixels where FRET occurred were identified and plotted on a separate scatter plot to those pixels without FRET and the mean FIR determined. FRET occurred between g.CLDN1 and r.CD81 at a frequency of 52%. Median FIR values of  $0.59 \pm 0.03$  ( $r^2$  0.48) and  $0.55 \pm 0.03$  ( $r^2$  0.52) were noted in the presence or absence of FRET, respectively, demonstrating that FRET has a minimal effect on the inferred protein stoichiometry.

**Fig.S2. CLDN viral receptor activity.** The panel of AcGFP (g) tagged CLDN proteins were expressed in 293T cells and infected with either HCVpp, MLVpp or Env-pp. Data is represented as specific infectivity where the mean luciferase levels (relative light units [RLU]) for triplicate wells infected with HCVpp (A) or MLVpp (B) are shown, where the mean Env-pp value was subtracted. Data from a single representative experiment is shown.

**Fig.S3. The role of cholesterol in CD81-CD81 and CLDN1-CD81 association(s).** 293T cells were transfected to express AcGFP (g) and DsRED (r) fluorescent tagged g.CD81-r.CD81 or g.CLDN1-r.CD81 and treated with the cholesterol depleting agent methyl- $\beta$ -cyclodextrin (M $\beta$ CD) for 1h at 37°C prior to measuring viral co-receptor association(s). CD81-CD81 and CLDN1-CD81 FIR and FRET analysis of ten individual cells is summarised and representative scatter plots shown.

**Fig.S4. Effect of CLDN1 and CLDN7 EC1 mutations on HCV entry.** 293T cells were transfected to express AcGFP tagged wild type and CLDN1 and CLDN7 EC1 mutations and DsRED-CD81 and infected with either HCVpp, MLVpp or Env-pp. Data is represented as specific infectivity where the mean luciferase levels (relative light units [RLU]) for triplicate wells infected with HCVpp (A) or MLVpp (B) are shown, where the mean Env-pp value was subtracted. Data from a single representative experiment is shown.

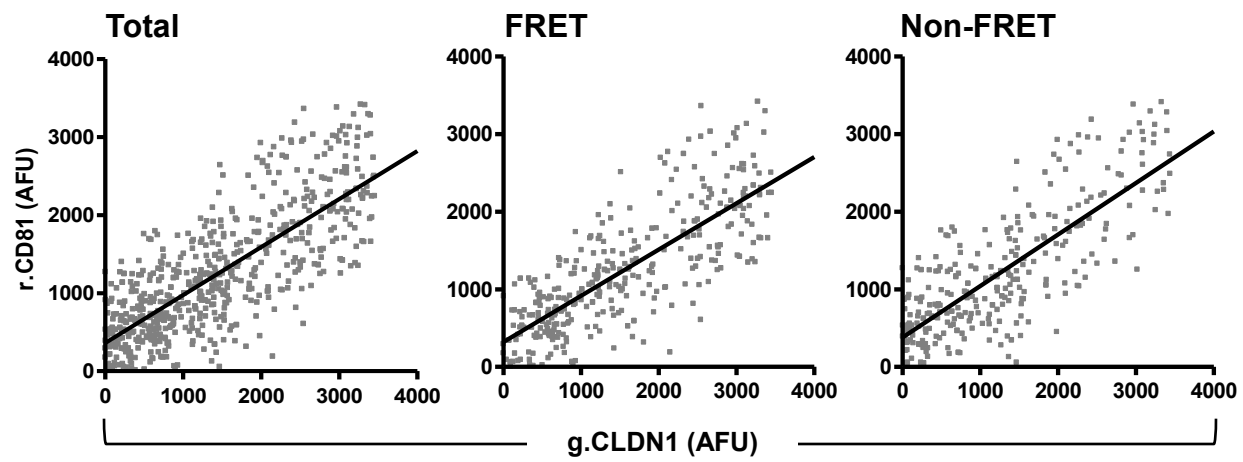

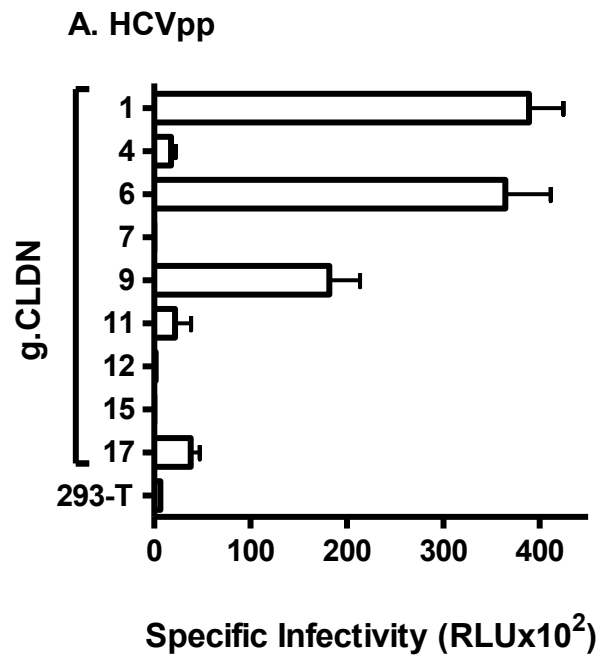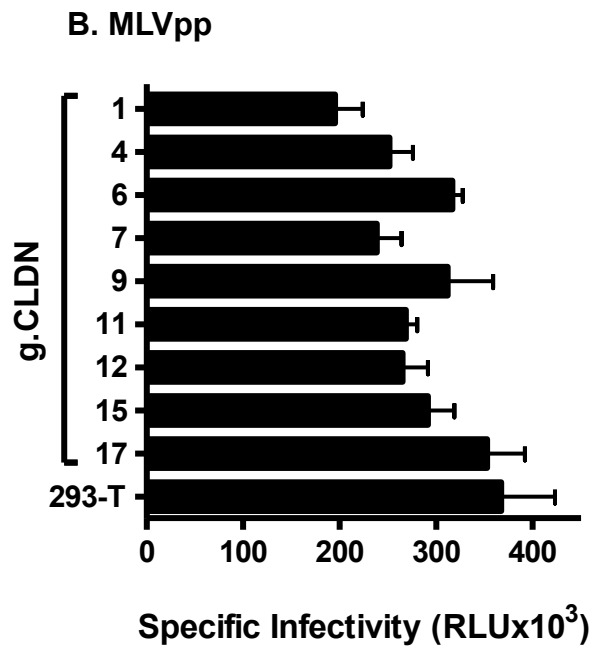

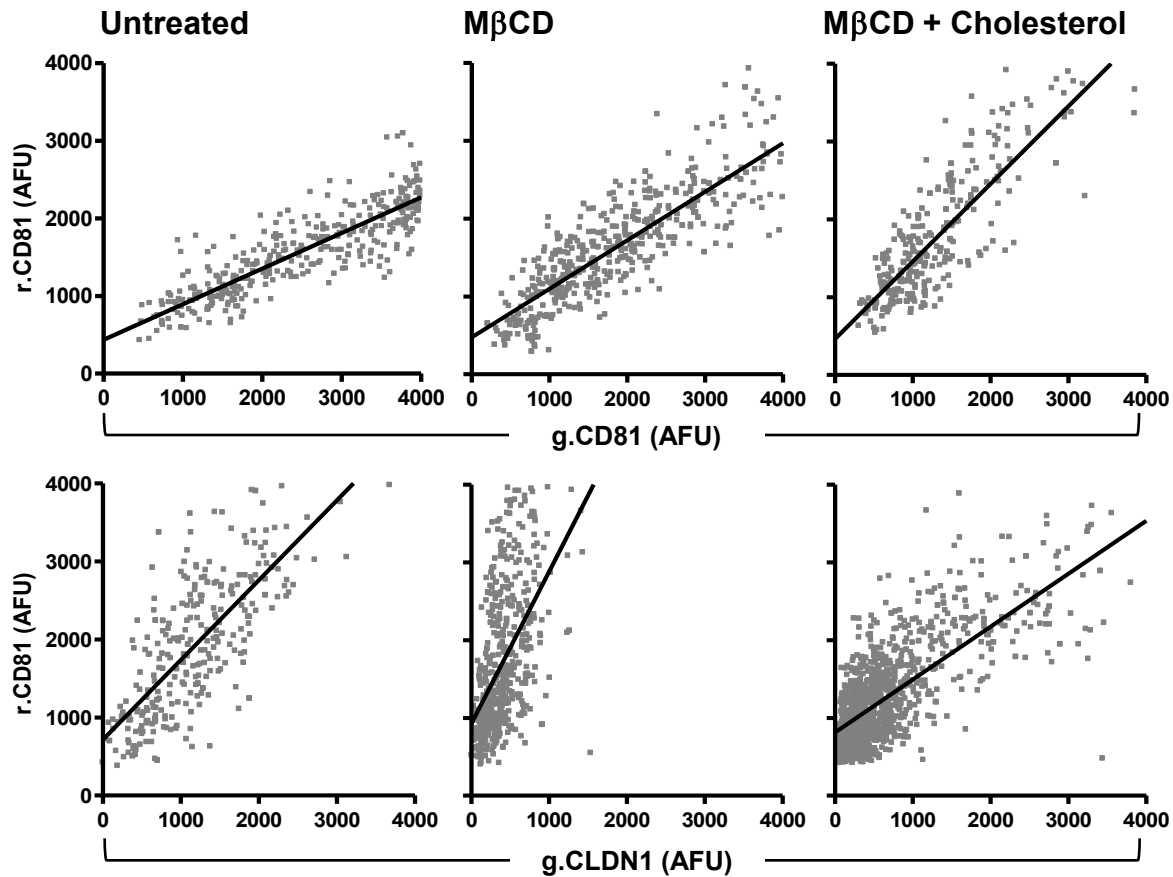

|                     | Cholesterol<br>( $\mu\text{M}/\text{mg}$ protein) | CD81-CD81 association |                   |            | CLDN1-CD81 association |                   |             |
|---------------------|---------------------------------------------------|-----------------------|-------------------|------------|------------------------|-------------------|-------------|
|                     |                                                   | $r^2$ (IQR)           | FIR (IQR)         | %FRET      | $r^2$                  | FIR (IQR)         | %FRET       |
| Untreated           | $3.0 \pm 0.04$                                    | 0.7 (0.58 - 0.81)     | 0.8 (0.68 - 0.91) | $63 \pm 5$ | 0.4 (0.27 - 0.42)      | 0.8 (0.71 - 1.02) | $50 \pm 2$  |
| M $\beta$ CD        | $1.5 \pm 0.02$                                    | 0.6 (0.42 - 0.71)     | 0.6 (0.53 - 0.70) | $55 \pm 2$ | 0.3 (0.22 - 0.50)      | 1.3 (1.00 - 2.00) | $35 \pm 10$ |
| M $\beta$ CD + Chol | $2.1 \pm 0.09$                                    | 0.8 (0.63 - 0.84)     | 1.0 (0.81 - 1.17) | $72 \pm 2$ | 0.4 (0.37 - 0.49)      | 0.7 (0.56 - 0.72) | $50 \pm 5$  |

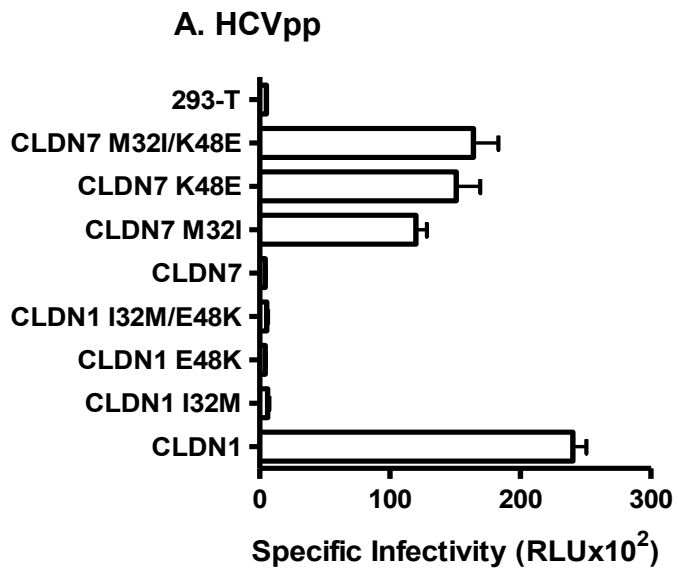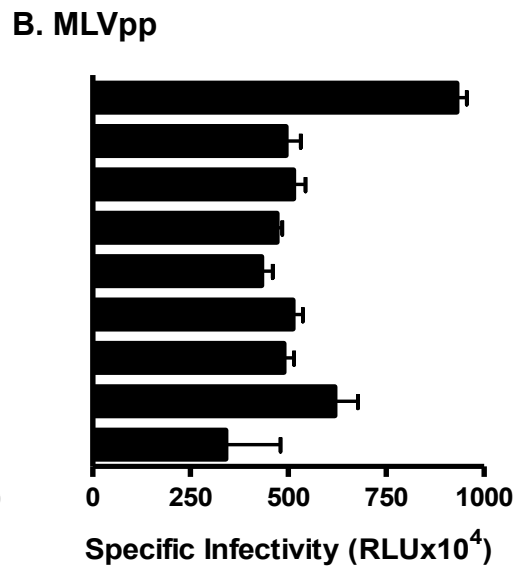

Supplement: supp_M110.104836_jbc.M110.104836-1.pdf [file supp_M110.104836_jbc.M110.104836-1.pdf]
